# Supplementary material for: Heterogeneously Integrated Photonic Chip on Lithium Niobate Thin-Film Waveguide
Source: MDPI journal article supplement (doi:10.3390/cryst11111376), 2021-11-12
Supplement: s1 [file s1]

**Table S1.** Design parameters for the proposed quantum integration chip.

|                              | Width (nm)  | Thickness (nm) | Length (μm)                    | Period (nm)           | duty cycle                  | Etch depth (nm) |  |  |
|------------------------------|-------------|----------------|--------------------------------|-----------------------|-----------------------------|-----------------|--|--|
| grating coupler              | 500         | 300            | 25                             | 580                   | 0.5                         | 240             |  |  |
|                              | Width(nm)   | Thickness (nm) | Straight waveguide length (μm) | width of the gap (nm) | Radius (μm)                 | Gap(μm)         |  |  |
| directional coupler          | 500         | 3300           | 50                             | 200                   | 300                         | 2.75            |  |  |
|                              | Width (nm)  | Thickness(nm)  | Length(μm)                     |                       |                             |                 |  |  |
| GaAs waveguide               | 370         | 130            | 21.2894                        |                       |                             |                 |  |  |
|                              | Width (nm)  | Thickness (nm) | Length (nm)                    | oxide thickness (μm)  | Silica oxide thickness (μm) |                 |  |  |
| LiNbO <sub>3</sub> waveguide | 719         | 300            | 130                            | 2.4                   | 7                           |                 |  |  |
|                              | Width1 (nm) | Width2 (nm)    | Thickness (nm)                 | Length (μm)           |                             |                 |  |  |
| GaAs taper                   | 370         | 50             | 130                            | 50                    |                             |                 |  |  |
|                              | Width(μm)   | Thickness(μm)  |                                |                       |                             |                 |  |  |
| electrode                    | 30          | 1              |                                |                       |                             |                 |  |  |
